# Supplementary material for: Alternative signaling network activation through different insulin receptor family members caused by pro-mitogenic antidiabetic insulin analogues in human mammary epithelial cells
Source: PubMed Central journal article supplement (PMC4506606; doi:10.1186/s13058-015-0600-5), 2015-07-19

A

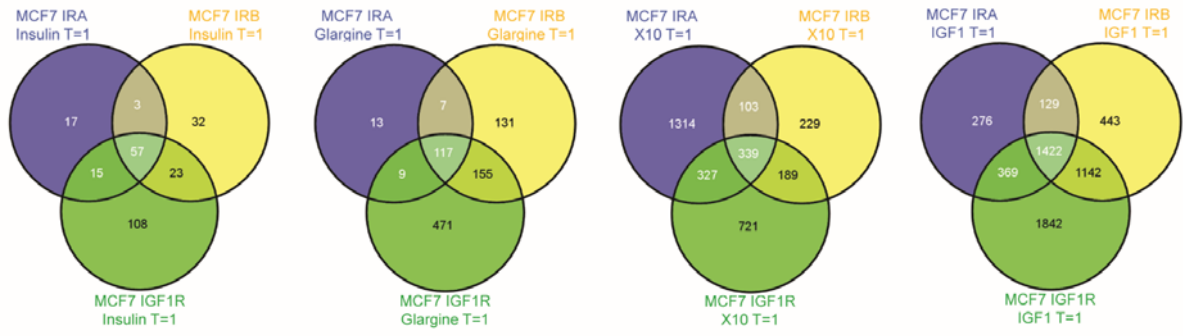

B

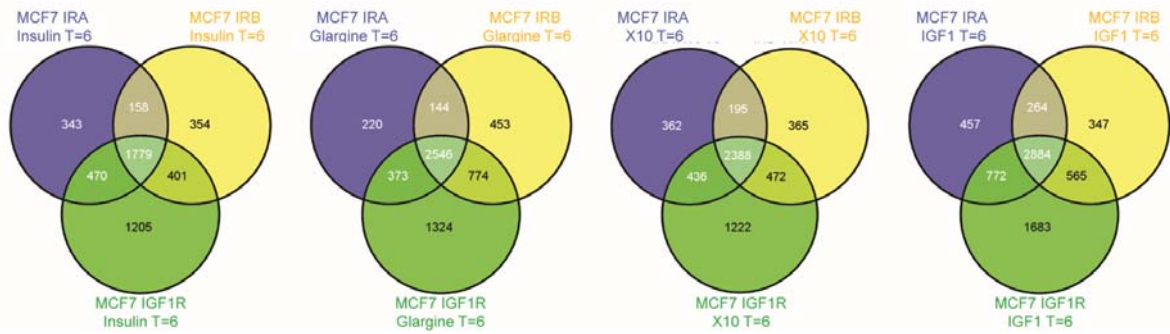

Supplement: 13058_2015_600_MOESM3_ESM.pdf [file 13058_2015_600_MOESM3_ESM.pdf]
