# Supplementary material for: Alternative signaling network activation through different insulin receptor family members caused by pro-mitogenic antidiabetic insulin analogues in human mammary epithelial cells
Source: Springer Nature journal article supplement (doi:10.1186/s13058-015-0600-5), 2015-07-18

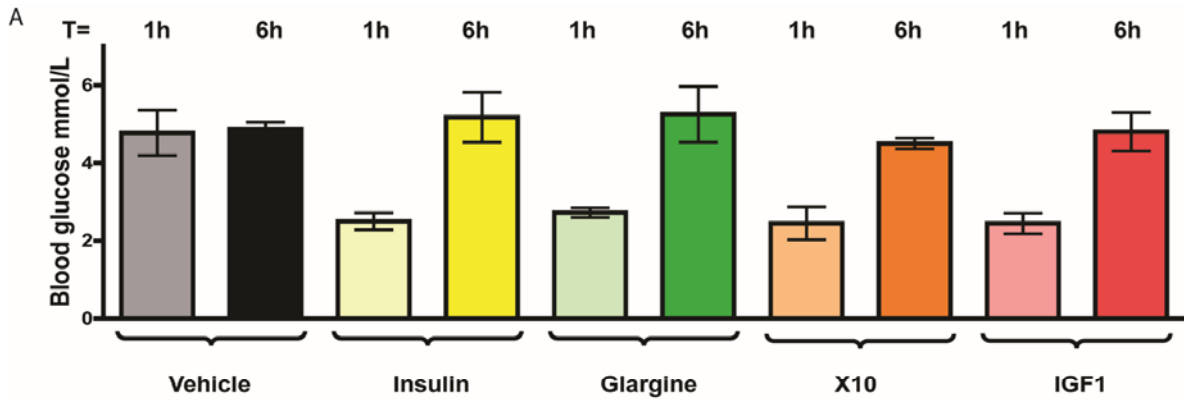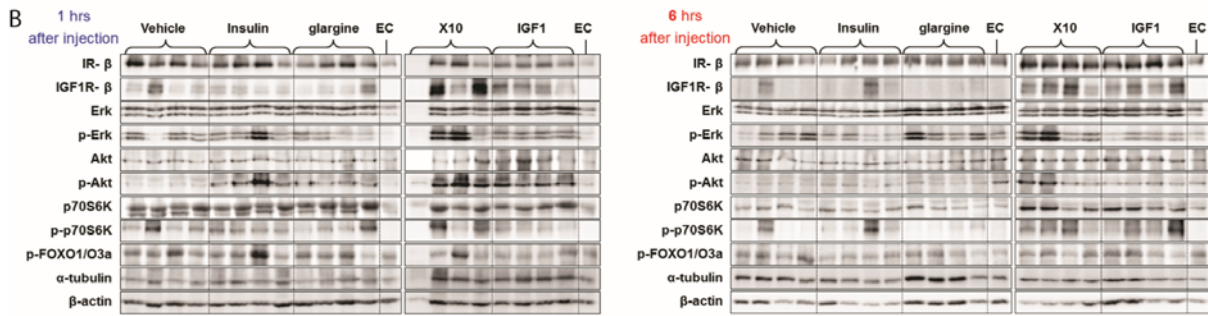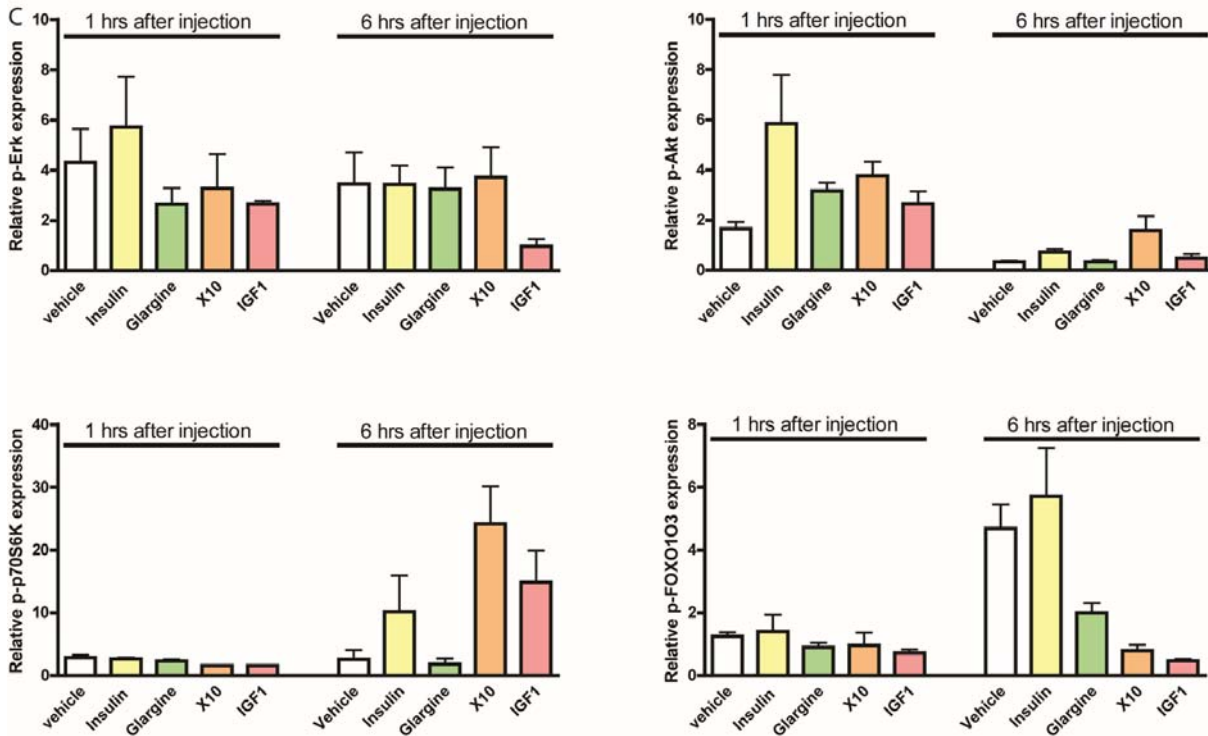

Supplement: MOESM2 [file 9781488]
